# Supplementary material for: A Multi-Region Magnetoimpedance-Based Bio-Analytical System for Ultrasensitive Simultaneous Determination of Cardiac Biomarkers Myoglobin and C-Reactive Protein
Source: MDPI journal article supplement (doi:10.3390/s18061765), 2018-06-01
Supplement: s1 [file s1]

# Supplementary Information

## A Multi-Region Magnetoimpedance-Based Bio-Analytical System for Ultrasensitive Simultaneous Determination of Cardiac Biomarkers Myoglobin and C-reactive Protein

Zhen Yang <sup>1,2,\*</sup>, Huanhuan Wang <sup>1,2</sup>, Pengfei Guo <sup>1,2</sup>, Yuanyuan Ding <sup>1,2</sup> Chong Lei <sup>3</sup> and Yongsong Luo <sup>1,2</sup>

<sup>1</sup> School of Physics and Electronic Engineering, Xinyang Normal University, Xinyang 464000, China; 13323978535@163.com (H.W.); guopengfei2010@126.com (P.G.); m15037680221@16.com (Y.D); eyslue@163.com (Y.L.)

<sup>2</sup> Key Laboratory of Microelectronics and Energy of Henan Province, Xinyang Normal University, Xinyang 464000, China;

<sup>3</sup> Department of Micro/Nano Electronics, School of electronic information and electrical engineering, Shanghai Jiao Tong University, Dongchuan Road 800, Shanghai 200240, China; leiqhd@sjtu.edu.cn

### 2.2. Microfabrication of MI element and MR-MFD

The meander-shaped MI element was designed for appropriate structural parameters in order to obtain the high performance in this work. The length of the straight-line segment in the tortuous structure was 5 mm. The widths of NiFe and Cu film were 160 and 140  $\mu\text{m}$ , respectively. The space between neighboring segments was 80  $\mu\text{m}$ . The thicknesses of the NiFe and Cu film were about 3 and 2  $\mu\text{m}$ , respectively.

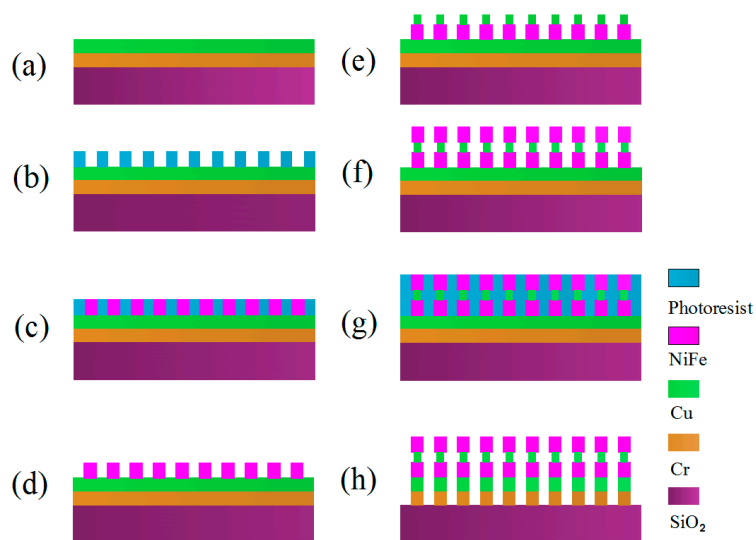

**Figure S1.** Fabrication steps of the MI element.

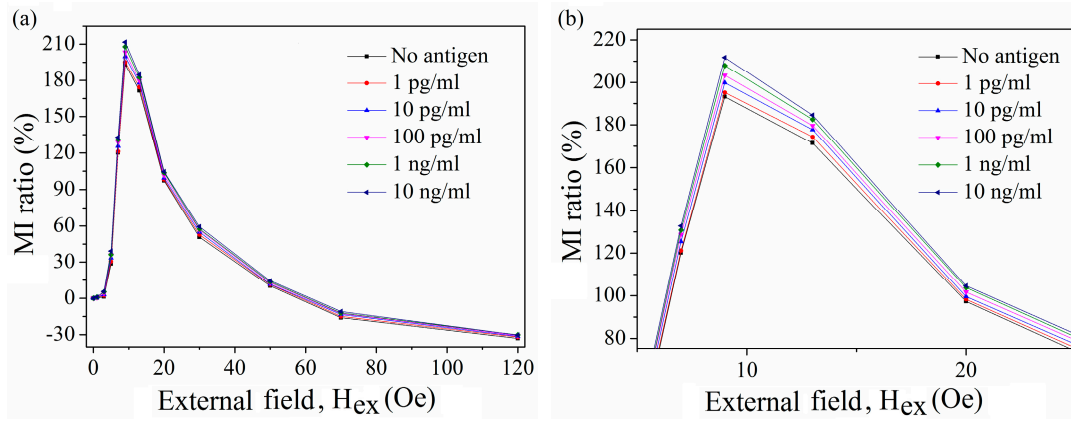

**Figure S2.** Field dependence of MI responses under the low concentration of CRP antigen (a) full view (b) partial enlargement.

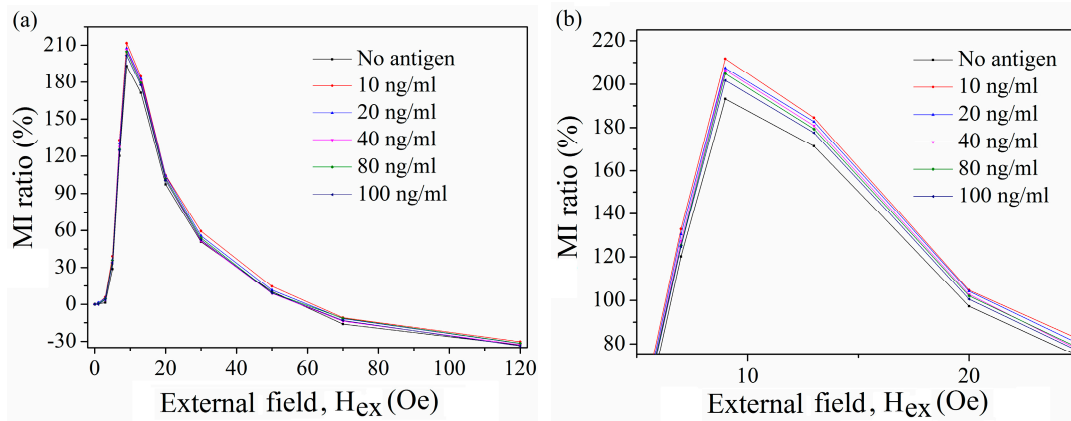

**Figure S3.** Field dependence of MI responses under the high concentration of CRP antigen (a) full view (b) partial enlargement.

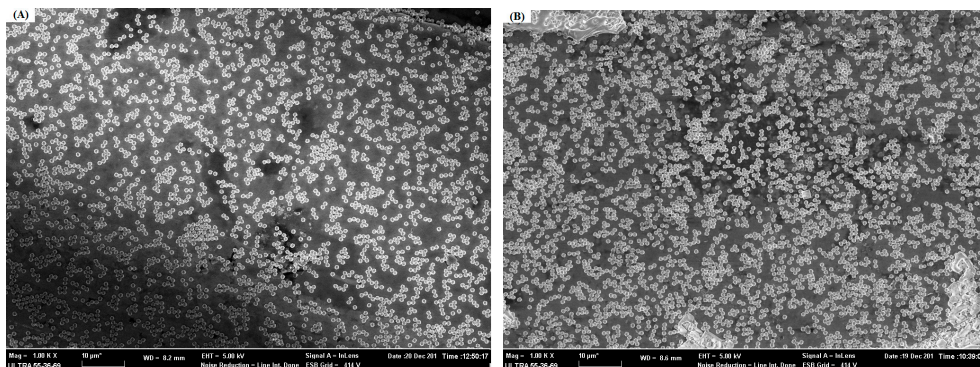

**Figure S4.** SEM characterizations CRP-conjugated Dynabeads at the concentration of 10 ng/ml (A) and SEM characterizations Mb-conjugated Dynabeads at the concentration of 10 ng/ml (B).
